# Supplementary material for: Acceptability of Mebendazole Chewable Tablet in Children Aged 2 to 4 Years in Peru
Source: MDPI journal article supplement (doi:10.3390/pharmaceutics14010027), 2021-12-23
Supplement: s1 [file s1]

# Supplementary Materials: Acceptability of Mebendazole Chewable Tablet in Children Aged 2 to 4 Years in Peru

Fernando Perez, Thibault Vallet, Zarela Bravo, Kristin Callahan and Fabrice Ruiz

**Table S1.** Patient and medicine characteristics of the 71 evaluations of tablet intake in children from 2 to 4 years of age within the dataset that gave rise to the acceptability reference framework.

| Characteristics                                                                                                       | n (%)     |
|-----------------------------------------------------------------------------------------------------------------------|-----------|
| <b>Sex</b>                                                                                                            |           |
| Female                                                                                                                | 34 (48)   |
| Male                                                                                                                  | 37 (52)   |
| <b>Age</b>                                                                                                            |           |
| 2 years                                                                                                               | 25 (35)   |
| 3 years                                                                                                               | 23 (32.5) |
| 4 years                                                                                                               | 23 (32.5) |
| <b>Treatment exposure</b>                                                                                             |           |
| Previous exposure                                                                                                     | 35 (49)   |
| First exposure                                                                                                        | 36 (51)   |
| <b>Setting</b>                                                                                                        |           |
| Community                                                                                                             | 6 (8)     |
| Hospital                                                                                                              | 65 (92)   |
| <b>Country</b>                                                                                                        |           |
| Morocco                                                                                                               | 39 (55)   |
| India                                                                                                                 | 25 (35)   |
| France                                                                                                                | 4 (6)     |
| Norway                                                                                                                | 3 (4)     |
| <b>2<sup>nd</sup> level (therapeutic subgroup) of the Anatomical Therapeutic Chemical (ATC) classification system</b> |           |
| Antiepileptics                                                                                                        | 14 (20)   |
| Psycholeptics                                                                                                         | 9 (13)    |
| Antivirals                                                                                                            | 9 (13)    |
| Antibacterials                                                                                                        | 9 (13)    |
| Antithrombotic agents                                                                                                 | 8 (11)    |
| Corticosteroids                                                                                                       | 4 (5)     |
| Other (<5%)                                                                                                           | 18 (25)   |
